# Supplementary material
Source: publisher site journal article supplement (https://www.dovepress.com/get_supplementary_file.php?f=369373.docx)
Supplement: Supplementary file 1 [file get_supplementary_file.php]

**Supplementary data**


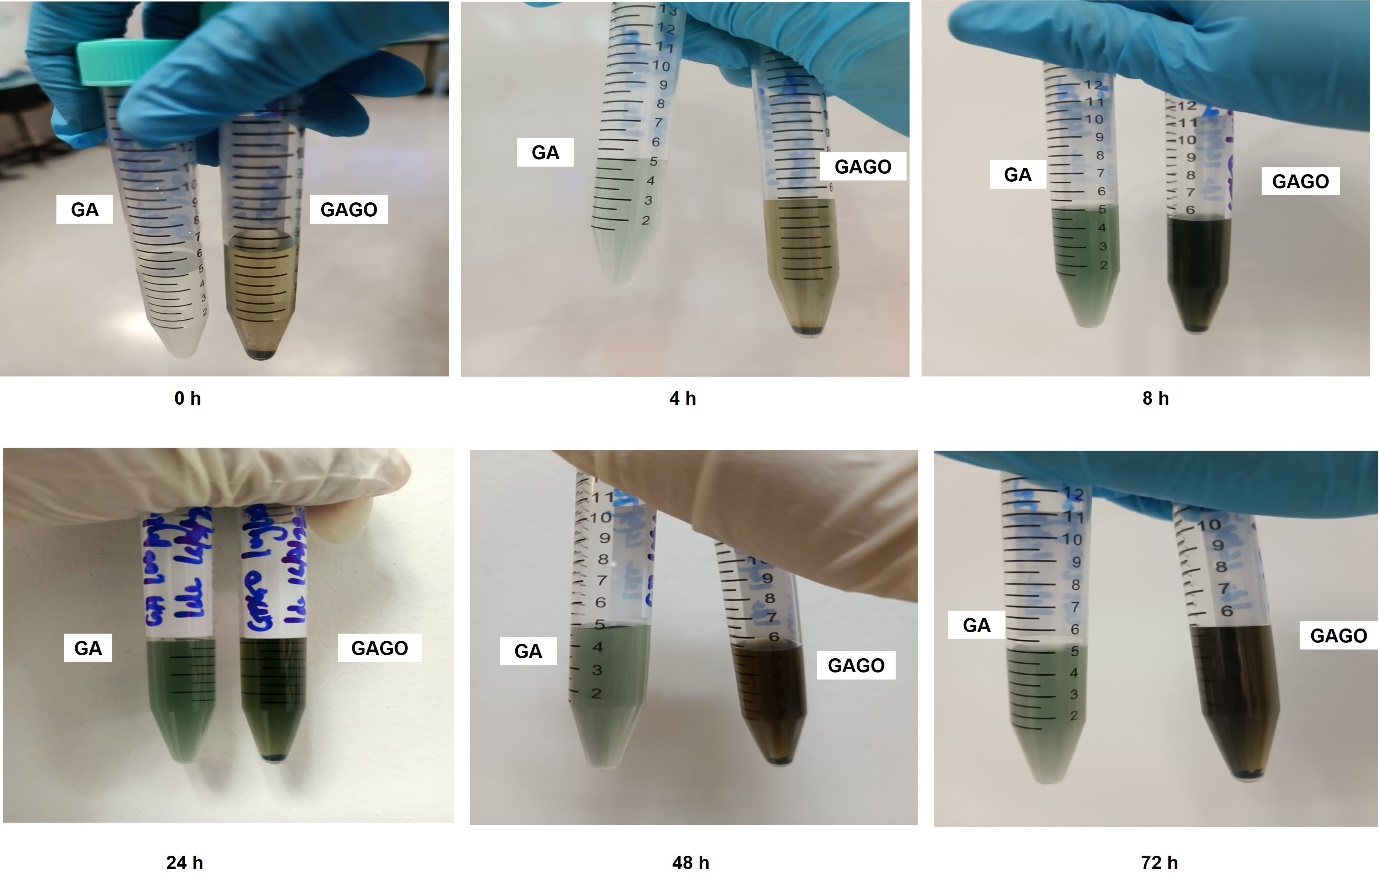


**Figure S1:** Stability of GA and GAGO in PBS, pH 7.4 following incubation for 72 h in a shaking incubator operating at 120 rpm, 37 °C. GA was shown to be unstable as early as 4h, in which was observed by the change in colour of the GA solution, compared to GAGO.


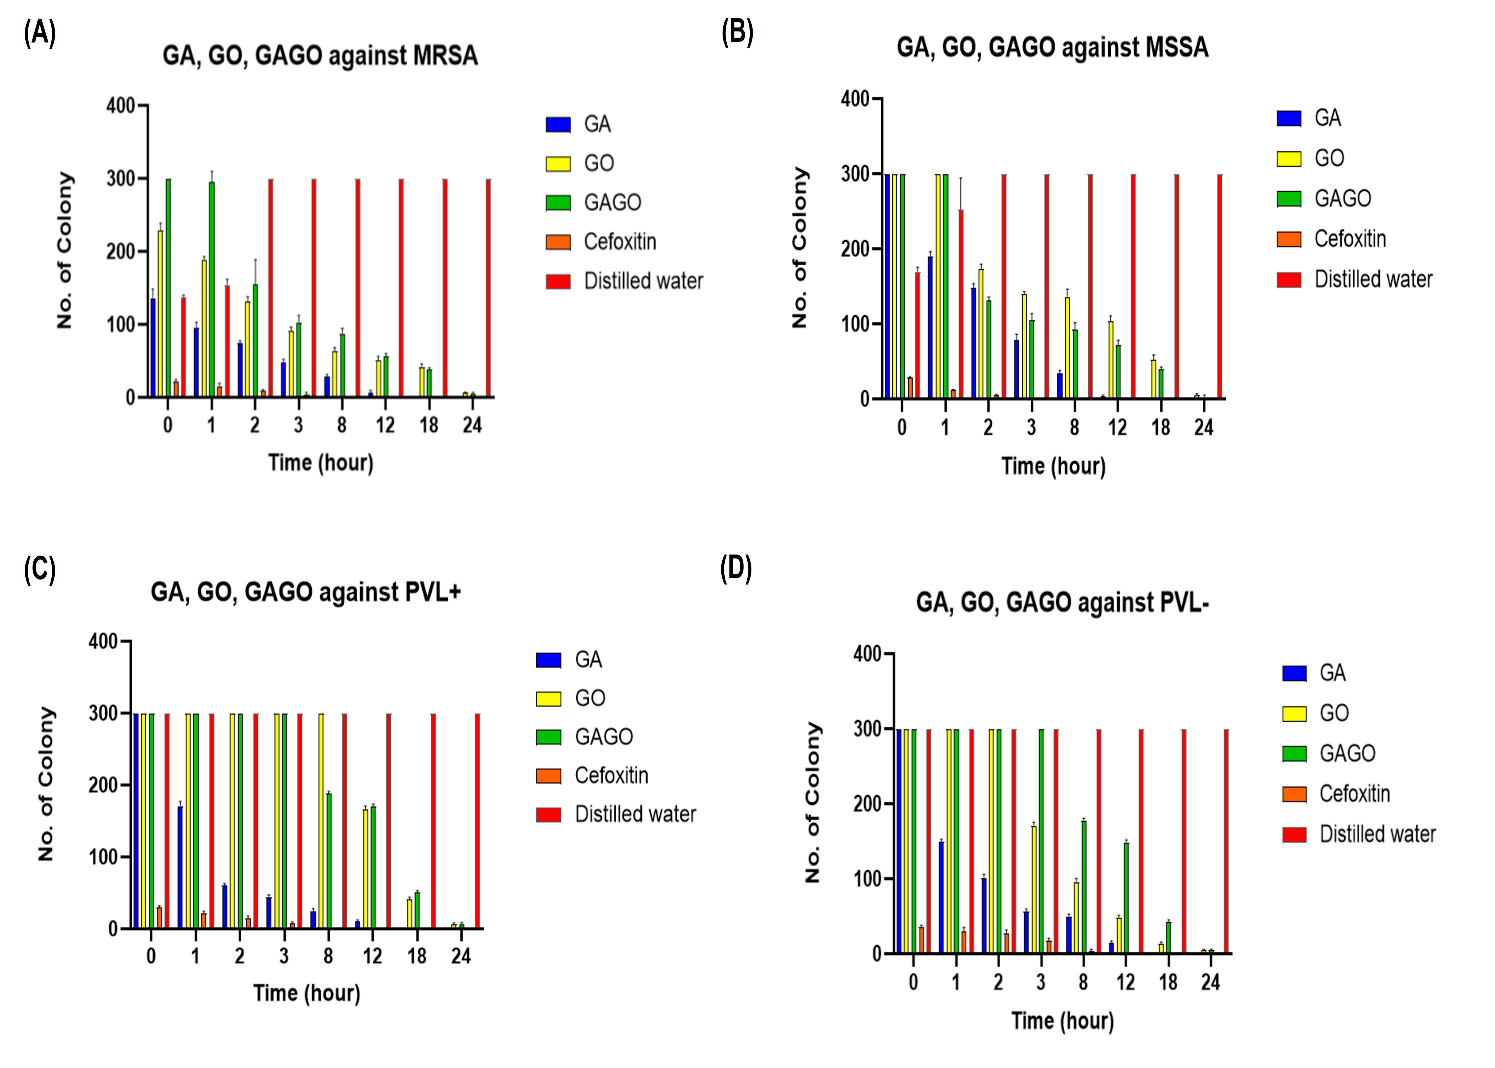


**Figure S2:** Time kill study of (A) MRSA, (B) MSSA, (C) MRSA-*pvl*+, and (D) MRSA-*pvl-* following exposure to GA, GO, and GAGO for 0–24 h at 150 µg/mL. MRSA, MSSA, MRSA-*pvl*+, and MRSA-*pvl-* treated with distilled water served as negative control (CTRL), while CFX acts as the positive control. Data represent mean *± SD* (n = 3).
